# Supplementary material for: Tracking of activated cTfh cells following sequential influenza vaccinations reveals transcriptional profile of clonotypes driving a vaccine-induced immune response
Source: PubMed Central journal article supplement (PMC10095155; doi:10.3389/fimmu.2023.1133781), 2023-03-29
Supplement: DataSheet_1.pdf [file DataSheet_1.pdf]

## SUPPLEMENTARY MATERIAL

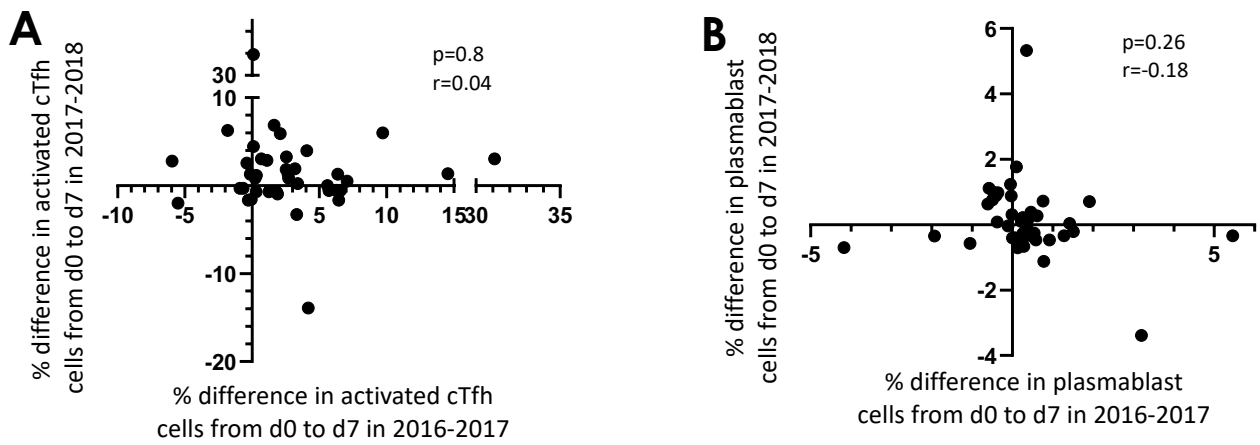

**Supplementary Fig 1.** The magnitude of (A) cTfh and (B) plasmablast activation did not correlate between vaccination years.

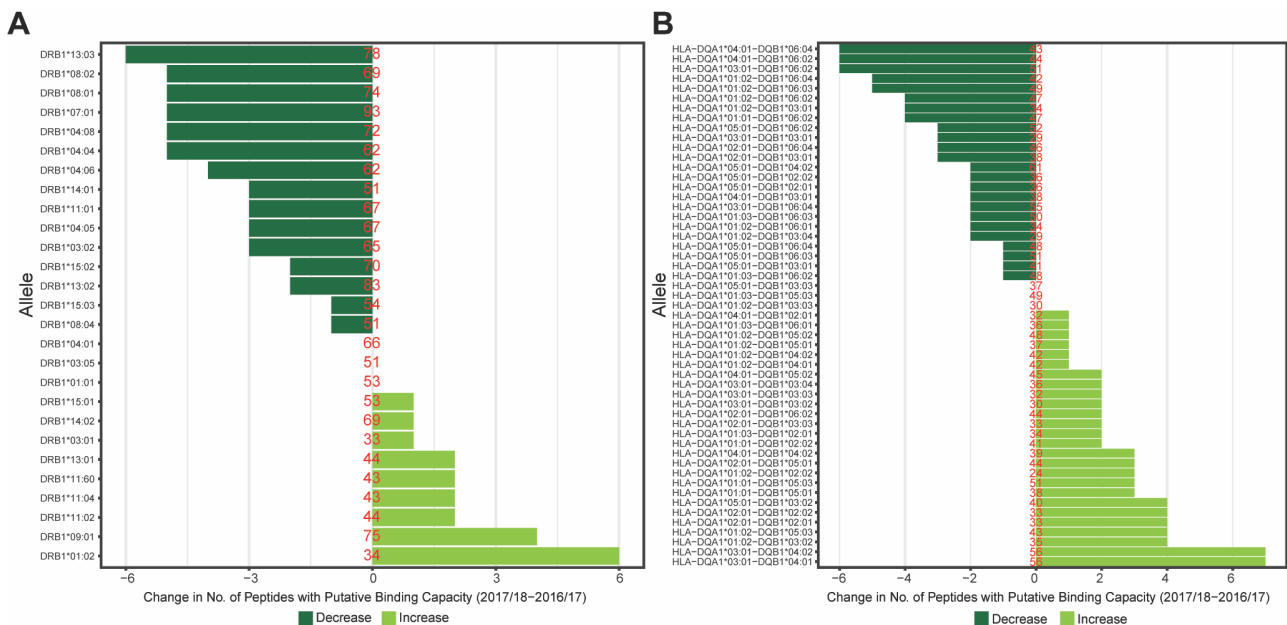

**Supplementary Fig 2.** Genetic variation in H1N1 strains results in differing numbers of predicted peptides with binding affinities. Peptides with predicted capacity to bind to all HLA-DR alleles (A) and -DQ allele combinations (B) within the cohort were identified. Using the 2016-17 vaccine season as a baseline, a change in the number of peptides with predicted binding capacity was identified with overlap indicated centrally in red.

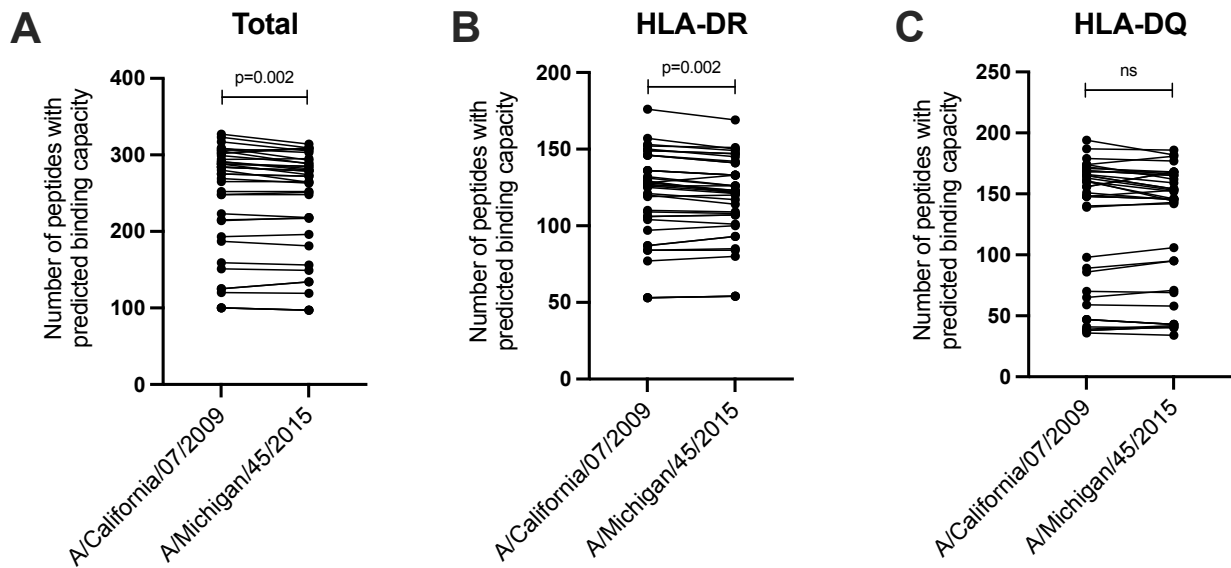

**Supplementary Fig 3. Genetic variation between influenza A H1N1 A/California/7/2009 and A/Michigan/45/2015 strains results in differences in predicted peptide binding affinities, potentially impacting subject-specific epitope repertoire.** Peptides with predicted capacity to bind to all HLA-DR alleles and allele combinations for each subject were identified. **(A)** Combined counts of predicted HLA-DR/DQ binding peptides shows a small, yet significant, reduction in the 2017-18 season, compared to 2016-17 in this cohort ( $p = 0.002$ ; Wilcoxon signed rank test). Moreover, this appears to be primarily driven by peptides associated with HLA-DR **(B;  $p=0.002$ ; Wilcoxon signed rank test)**, rather than with HLA-DQ **(C;  $p = 0.15$ ; Wilcoxon signed rank test)**.

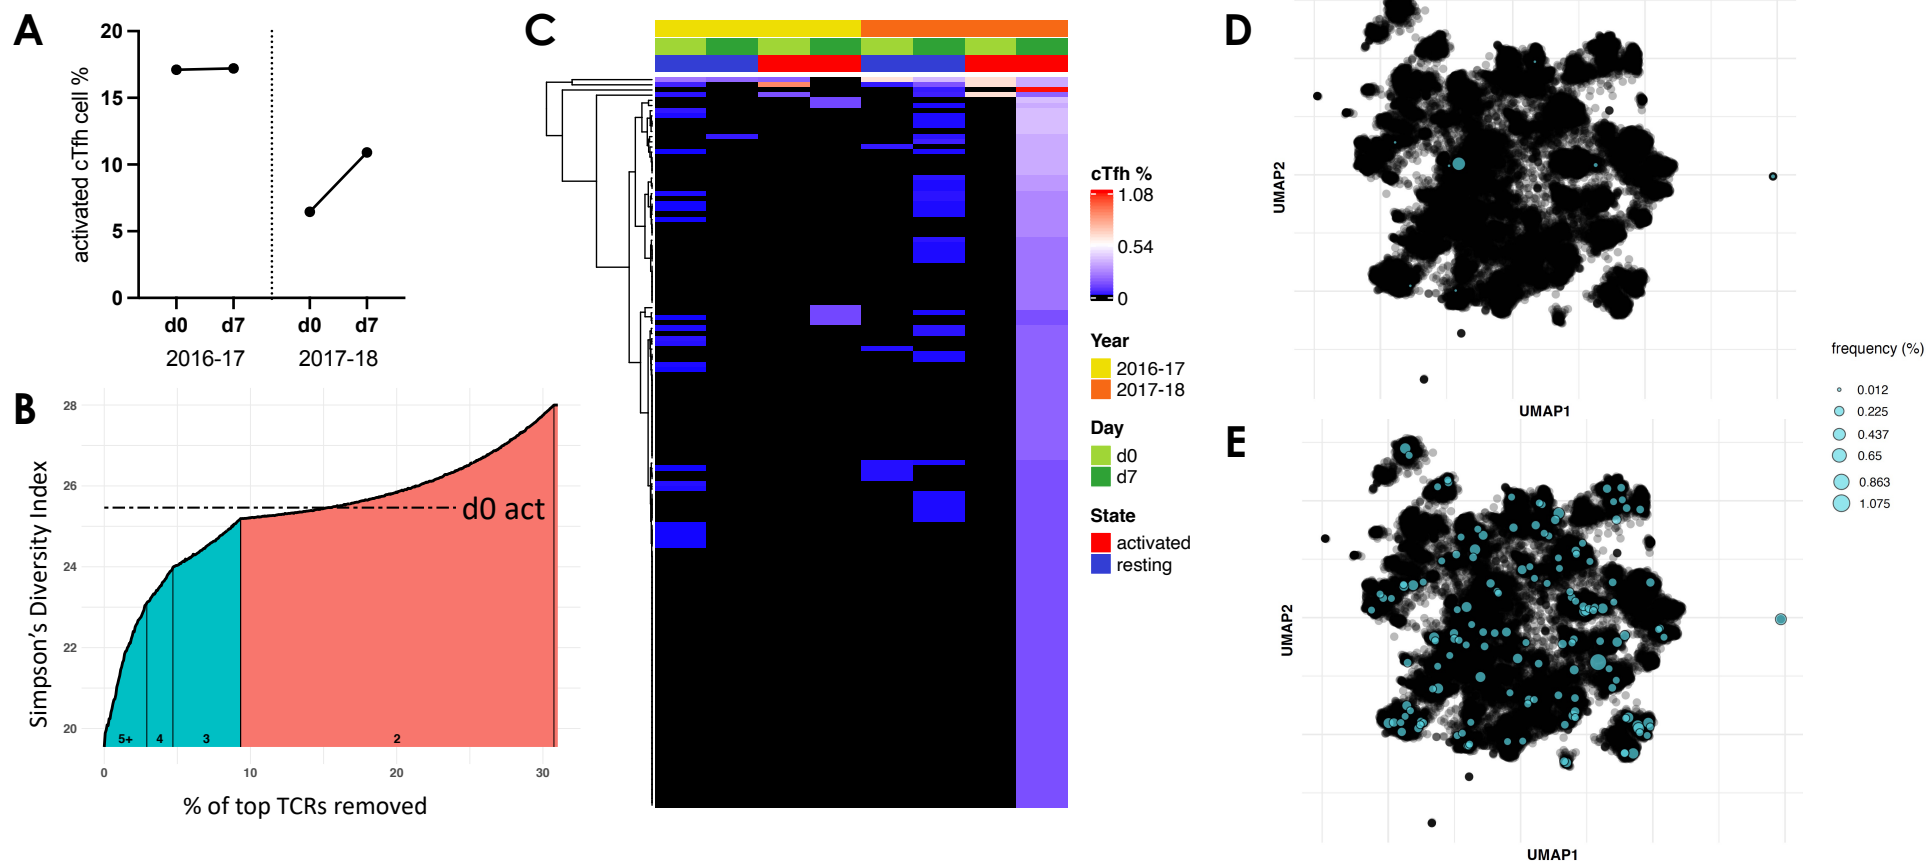

**Supplementary Fig 4. A sub-population of cTfh cells is expanded following influenza vaccination in 2017-18.** (A) Subject 10 showed an increase in cTfh cell response after the 2017-18 vaccine, with a minimal response the previous season. (B) Approximately 10% of activated cTfh cells at d7 expanded based on their TCR repertoire from d0 to d7 following the 2017-18 vaccine (shaded teal). As the intersection with d0 activated cTfh cell diversity fell within a count bracket, TCRs observed at this count (of 2) were not included in those deemed to be expanded. (C) The frequencies of cTfh cells with a TCR designated to be expanded from (B) are depicted for all conditions as a heatmap (hierarchical clustering). Of the cells expanded at d7 following the 2017-18 vaccination, very few TCRs were observed following the 2016-17 vaccine, nor in the d0 active populations. The TCR repertoire was clustered and expanded clonotypes post-vaccination in 2017-18 were highlighted for (D) d0 resting and (E) d7 active conditions.

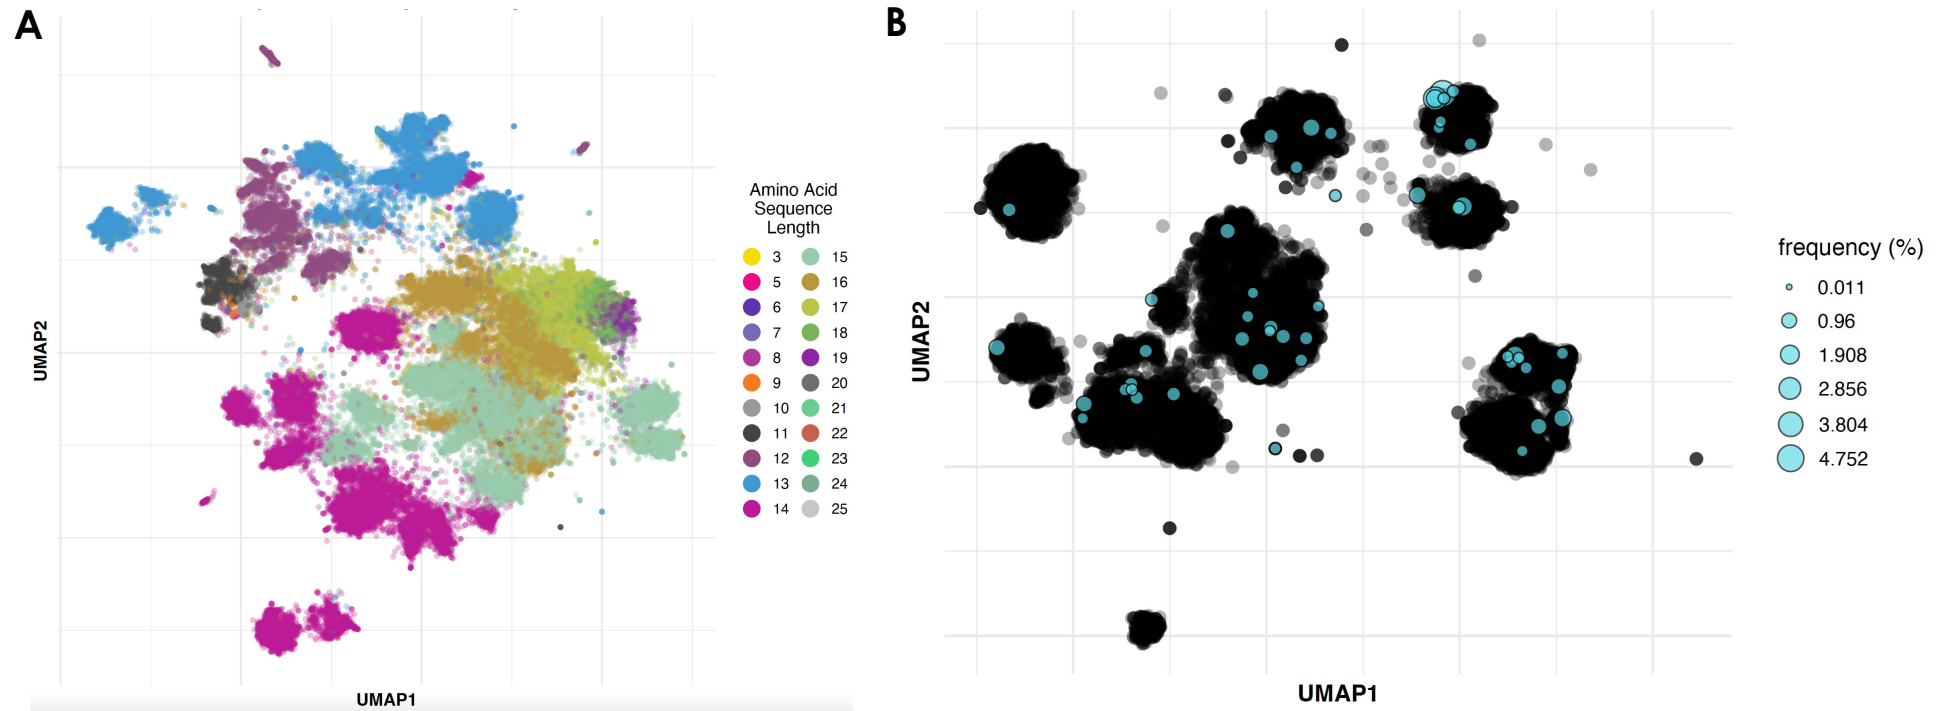

**Supplementary Fig 5. TCRs of the same length largely cluster together and expanded clonotypes likely identify different antigens. (A)** Clustering of all subject 6 TCRs is largely driven by CDR3 length. **(B)** Using only the dominant CDR3 length of 15, a further sub-clustering was identified. Highlighting those TCRs expanded in the d7 active population in 2016-17 identifies their presence in nearly all clusters.

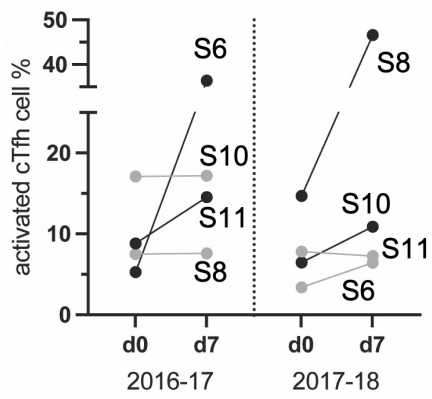

**Supplementary Fig 6. Expanded activated cTfh cells sorted for TCR $\beta$  sequencing and transcriptomic analysis.**

Percentage of cTfh cells activated at d0 and d7 for the four subjects selected for single cell sorting. The sorted samples from a season for each subject is in black, with the non-sorted samples from the alternate season in grey.

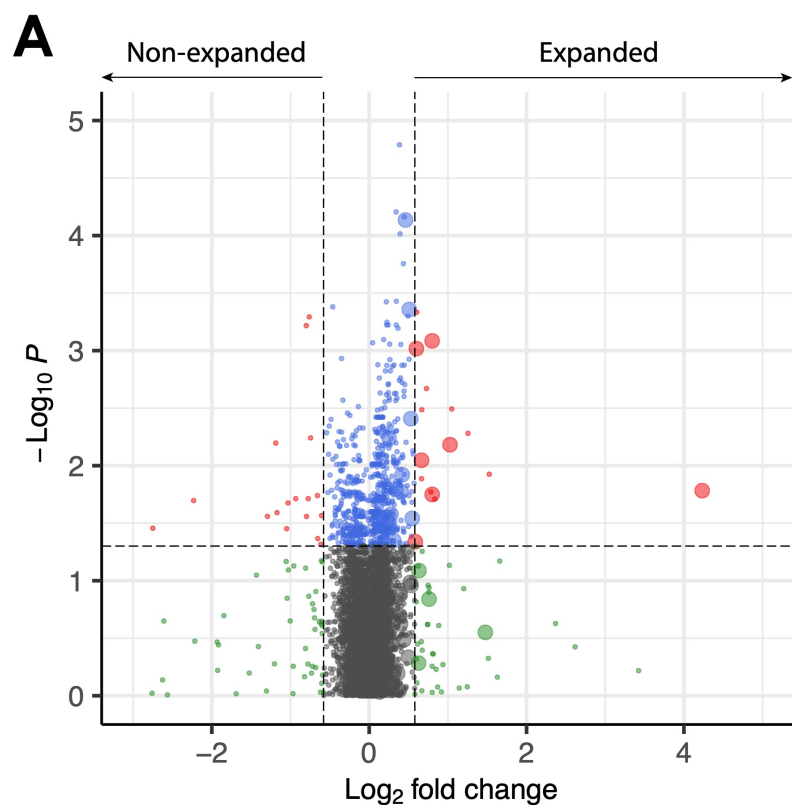

**B**

| Gene     | P value | Log2FC |
|----------|---------|--------|
| PSMD13   | 0.001   | 0.800  |
| ZNF615   | 0.001   | 0.600  |
| ARHGEF4  | 0.007   | 1.027  |
| MPHOSPH6 | 0.009   | 0.664  |
| AHNAK2   | 0.016   | 4.232  |
| OSER1    | 0.018   | 0.800  |
| MAF      | 0.046   | 0.585  |
| SLC7A6   | 0.082   | 0.632  |
| SP100    | 0.144   | 0.760  |
| IGLV2-8  | 0.281   | 1.476  |
| MRPL27   | 0.521   | 0.627  |
| MACF1    | 0.006   | 0.252  |
| PCDHB4   | 0.026   | 0.277  |
| CYTOR    | 0.045   | 0.312  |
| PTPRC    | 0.016   | 0.340  |
| AP1G1    | 0.017   | 0.405  |
| ATP5I    | 0.012   | 0.420  |
| RMND5A   | 0.000   | 0.462  |
| DCTN5    | 0.000   | 0.509  |
| RAC2     | 0.004   | 0.528  |
| HIST1H1E | 0.029   | 0.547  |

**C**

| Gene     | P value | Log2FC |
|----------|---------|--------|
| RHOG     | 0.056   | 0.479  |
| GPI      | 0.064   | 0.380  |
| POLR1D   | 0.104   | 0.519  |
| CDC42SE1 | 0.110   | 0.532  |
| BAZ1A    | 0.132   | 0.395  |
| CFD      | 0.202   | 0.390  |
| STMN1    | 0.237   | 0.400  |
| BAMBI    | 0.245   | -0.295 |
| PARP14   | 0.269   | 0.144  |
| ACTG1    | 0.299   | 0.005  |
| PTPN7    | 0.328   | 0.439  |
| ERAP2    | 0.400   | 0.052  |
| ELMO2    | 0.462   | 0.499  |
| ISG15    | 0.505   | -0.188 |
| RBM39    | 0.564   | 0.095  |
| HMGB3    | 0.574   | 0.228  |
| UCP2     | 0.638   | 0.362  |
| ANP32B   | 0.780   | -0.030 |
| ITGAL    | 0.856   | 0.292  |
| KIAA1429 | 0.898   | 0.382  |
| RBM25    | 0.909   | 0.047  |
| PSMA4    | 0.928   | 0.132  |

**Supplementary Fig 7. Different transcriptional profile between non-expanded and expanded activated cTfh cells at d7.** (A) Volcano plot comparing non-expanded and expanded activated cTfh cells for all four subjects at d7. Significant DEGs by both p value and fold change are depicted in red. Horizontal and vertical dotted lines represent a significance threshold of  $p < 0.05$  and a fold change of  $|1.5|$ , respectively. Significant DEGs identified to be upregulated in expanded cTfh cells compared to resting (Fig 6A) are depicted by an increased point size. Such genes that remained significant by either p value and fold change or by one alone are listed in (B), with those not significant listed in (C).

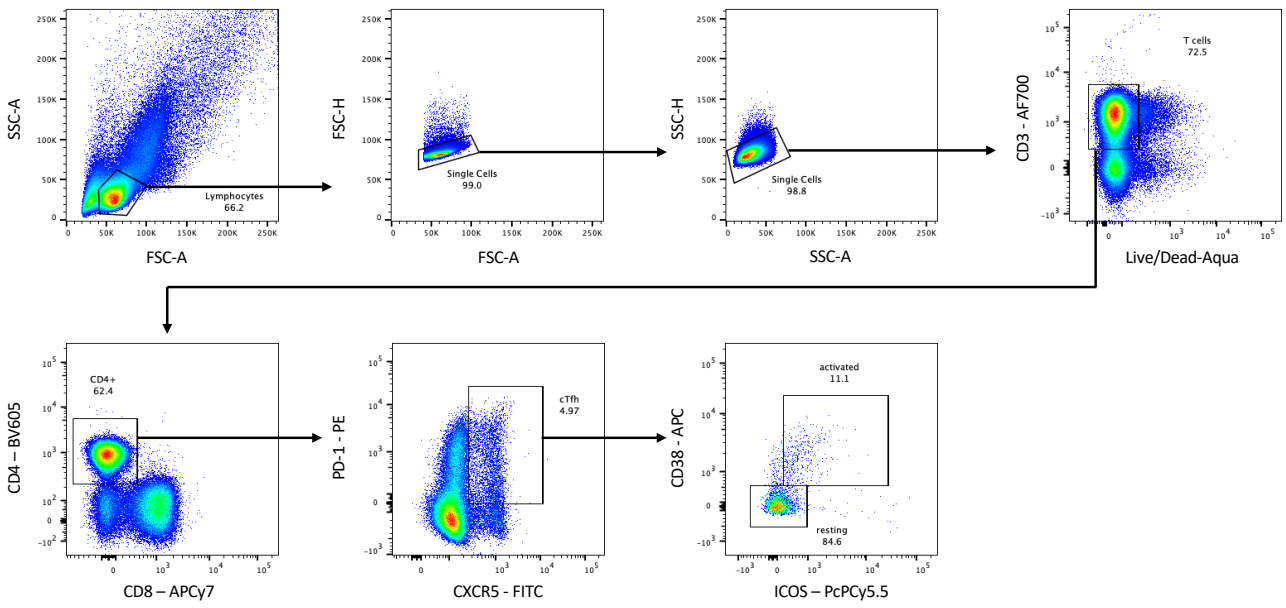

**Supplementary Fig 8. Example representation of flow gating for sorting resting and activated cTfh cells.** Gating strategy for quantifying and sorting activated and resting cTfh cell populations. The gating strategy was the same for all subjects.

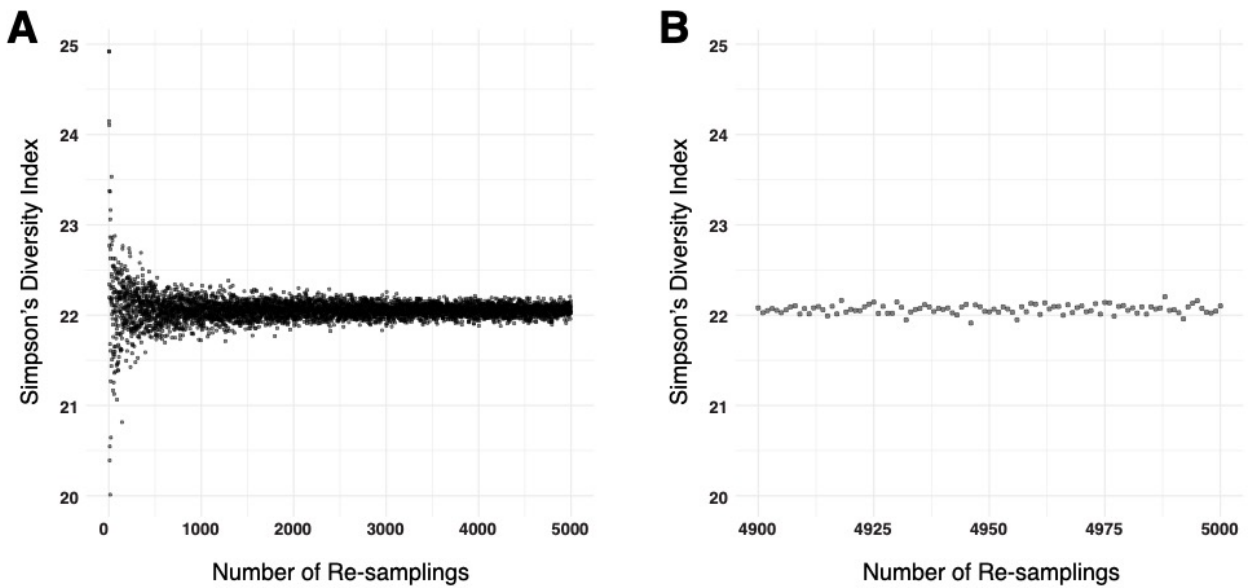

**Supplementary Fig 9. Representative plots showing the convergence of the Inverse Simpson's Index after 5000 re-samplings.** (A) The Inverse Simpson's Index scores for subject 9 for the 2017-18 season d0 resting cTfh population plotted after each resampling. (B) The final 100 re-samplings to show the convergence of scores after 5000 re-samplings.

**Supplementary Table 1.** Significant DEGs for resting (pct.2) versus expanded (pct.1) cTfh cells.

| Gene     | p value      | avg_log2FC    | pct.1 | pct.2 | p value adj |
|----------|--------------|---------------|-------|-------|-------------|
| MACF1    | 0.0000000079 | 0.6208870330  | 0.551 | 0.304 | 0.000143    |
| CYTOR    | 0.0000000090 | 0.6716239823  | 0.176 | 0.033 | 0.000164    |
| HIST1H1E | 0.0000000188 | 1.1318965066  | 0.324 | 0.128 | 0.000343    |
| ACTG1    | 0.0000000258 | 0.6378779815  | 0.653 | 0.426 | 0.000470    |
| PTPRC    | 0.0000029895 | 0.7058497206  | 0.792 | 0.629 | 0.054507    |
| UCP2     | 0.0000073690 | 0.8315937769  | 0.366 | 0.198 | 0.134359    |
| STMN1    | 0.0000087225 | 1.0368868685  | 0.111 | 0.021 | 0.159037    |
| ATP5I    | 0.0000126579 | 0.6535103202  | 0.431 | 0.252 | 0.230791    |
| DCTN5    | 0.0000161529 | 0.6087335093  | 0.199 | 0.076 | 0.294515    |
| GPI      | 0.0000177911 | 0.7981668470  | 0.301 | 0.152 | 0.324384    |
| RBM25    | 0.0000244956 | 0.6737479913  | 0.495 | 0.316 | 0.446629    |
| RMND5A   | 0.0000263174 | 0.7337272221  | 0.384 | 0.237 | 0.479846    |
| RAC2     | 0.0000296488 | 0.7546608568  | 0.421 | 0.243 | 0.540586    |
| PARP14   | 0.0000364068 | 0.6573188668  | 0.269 | 0.131 | 0.663805    |
| ELMO2    | 0.0000394611 | 1.0133022184  | 0.083 | 0.012 | 0.719495    |
| BAZ1A    | 0.0000781682 | 0.6488328349  | 0.241 | 0.112 | 1.000000    |
| PSMA4    | 0.0000814762 | 0.6460279037  | 0.208 | 0.088 | 1.000000    |
| RHOG     | 0.0002819918 | 0.5875045876  | 0.269 | 0.143 | 1.000000    |
| ANP32B   | 0.0006924191 | 0.6292760648  | 0.417 | 0.271 | 1.000000    |
| AP1G1    | 0.0009377339 | 0.6063159537  | 0.398 | 0.271 | 1.000000    |
| BAMBI    | 0.0011299783 | 0.9619940041  | 0.176 | 0.082 | 1.000000    |
| CFD      | 0.0014171947 | 0.5985408109  | 0.13  | 0.055 | 1.000000    |
| MRPL27   | 0.0018071849 | 0.7758590696  | 0.12  | 0.049 | 1.000000    |
| PTPN7    | 0.0018149946 | 0.6566742544  | 0.088 | 0.027 | 1.000000    |
| CDC42SE1 | 0.0023083782 | 0.7943541627  | 0.282 | 0.17  | 1.000000    |
| RBM39    | 0.0029178671 | 0.5803056132  | 0.514 | 0.386 | 1.000000    |
| MPHOSPH6 | 0.0056297656 | 0.6990185726  | 0.083 | 0.03  | 1.000000    |
| PSMD13   | 0.0073109283 | 0.7161037207  | 0.134 | 0.067 | 1.000000    |
| PCDHB4   | 0.0074239575 | 0.7315157913  | 0.25  | 0.152 | 1.000000    |
| POLR1D   | 0.0074988640 | 0.6580319138  | 0.148 | 0.079 | 1.000000    |
| MAF      | 0.0076830342 | 0.5932827616  | 0.301 | 0.207 | 1.000000    |
| ISG15    | 0.0081573236 | 0.6602957888  | 0.218 | 0.134 | 1.000000    |
| SP100    | 0.0093856785 | 0.7821620123  | 0.315 | 0.222 | 1.000000    |
| IGLV2-8  | 0.0133890338 | 1.5251779139  | 0.019 | 0     | 1.000000    |
| ZNF615   | 0.0137175731 | 0.6249298878  | 0.046 | 0.012 | 1.000000    |
| HMGB3    | 0.0139987762 | 0.7576071325  | 0.292 | 0.207 | 1.000000    |
| AHNAK2   | 0.0181253260 | 0.8897758147  | 0.056 | 0.018 | 1.000000    |
| KIAA1429 | 0.0205917666 | 0.6541444338  | 0.144 | 0.082 | 1.000000    |
| ERAP2    | 0.0235117779 | 0.7446093114  | 0.134 | 0.076 | 1.000000    |
| SLC7A6   | 0.0273358181 | 0.7511199994  | 0.13  | 0.073 | 1.000000    |
| ARHGEF4  | 0.0276064141 | 0.7382693346  | 0.042 | 0.012 | 1.000000    |
| OSER1    | 0.0291831097 | 0.7157346527  | 0.102 | 0.052 | 1.000000    |
| ITGAL    | 0.0329792909 | 0.5961151515  | 0.208 | 0.149 | 1.000000    |
| HBA2     | 0.0000000001 | -2.5203744888 | 0     | 0.173 | 0.000002    |
| CXCR4    | 0.0000000013 | -1.5938117806 | 0.218 | 0.456 | 0.000024    |
| TXNIP    | 0.0000012837 | -1.0370515296 | 0.514 | 0.653 | 0.023405    |
| IL7R     | 0.0011426220 | -0.5862386199 | 0.505 | 0.629 | 1.000000    |
| SERPINB9 | 0.0022591109 | -0.5963638969 | 0.111 | 0.204 | 1.000000    |
| HBA1     | 0.0026303910 | -0.8667824357 | 0.005 | 0.052 | 1.000000    |
| HK3      | 0.0036269135 | -2.8547663473 | 0.505 | 0.584 | 1.000000    |
| EEF1B2   | 0.0050037217 | -0.6016907093 | 0.407 | 0.477 | 1.000000    |
| HBB      | 0.0057064382 | -0.7846702840 | 0.005 | 0.046 | 1.000000    |
| ACTR3C   | 0.0059350225 | -0.6729292926 | 0.069 | 0.143 | 1.000000    |
| STOX1    | 0.0116885829 | -1.2677958807 | 0.019 | 0.064 | 1.000000    |
| CLOCK    | 0.0286693031 | -0.6451162131 | 0.259 | 0.173 | 1.000000    |
| AHNAK    | 0.0301148848 | -0.7498502452 | 0.509 | 0.562 | 1.000000    |
| PFDN5    | 0.0311793671 | -0.6045528229 | 0.63  | 0.66  | 1.000000    |
| IGKC     | 0.0385136137 | -1.2523270923 | 0.111 | 0.173 | 1.000000    |



**Supplementary Table 2.** Significant DEGs for non-expanded (pct.2) versus expanded (pct.1) activated cTfh cells.

| Gene          | p value     | avg_log2FC | pct.1 | pct.2 | pvalue adj |
|---------------|-------------|------------|-------|-------|------------|
| SELPLG        | 0.000464212 | 0.6032718  | 0.389 | 0.261 | 1          |
| PSMD13        | 0.00082306  | 0.79966    | 0.134 | 0.056 | 1          |
| ZNF615        | 0.000960858 | 0.5996825  | 0.046 | 0.006 | 1          |
| ABCG4         | 0.002138128 | 0.7281582  | 0.042 | 0.006 | 1          |
| SBSN          | 0.003211934 | 1.049395   | 0.032 | 0.003 | 1          |
| CTD-2503O16.4 | 0.003265329 | 0.668588   | 0.032 | 0.003 | 1          |
| C8orf46       | 0.005243575 | 1.2560952  | 0.148 | 0.075 | 1          |
| ARHGEF4       | 0.006578019 | 1.0273812  | 0.042 | 0.008 | 1          |
| MPHOSPH6      | 0.008972941 | 0.6644007  | 0.083 | 0.033 | 1          |
| SNTB2         | 0.011871904 | 1.5255788  | 0.278 | 0.192 | 1          |
| TP53INP1      | 0.012981393 | 0.6648019  | 0.12  | 0.061 | 1          |
| AHNAK2        | 0.016496905 | 4.2318998  | 0.056 | 0.019 | 1          |
| CRB2          | 0.016886146 | 0.7845745  | 0.046 | 0.014 | 1          |
| OSER1         | 0.017789568 | 0.8000804  | 0.102 | 0.05  | 1          |
| FAM120B       | 0.019493493 | 0.8340513  | 0.259 | 0.181 | 1          |
| MAF           | 0.045887326 | 0.5853296  | 0.301 | 0.239 | 1          |
| FAM227A       | 0.0005093   | -0.7616489 | 0.171 | 0.289 | 1          |
| EGFR          | 0.000605735 | -0.799702  | 0     | 0.053 | 1          |
| ZNF267        | 0.005739967 | -0.744954  | 0.056 | 0.125 | 1          |
| NR2F1         | 0.006363269 | -1.1874837 | 0.028 | 0.083 | 1          |
| OR2C3         | 0.018217526 | -0.6576589 | 0.292 | 0.364 | 1          |
| RP11-344P13.4 | 0.019344393 | -0.774931  | 0     | 0.025 | 1          |
| SPATA31E1     | 0.019344393 | -0.9330313 | 0     | 0.025 | 1          |
| STOX1         | 0.020125014 | -2.2308595 | 0.019 | 0.058 | 1          |
| ZNF773        | 0.021086585 | -1.0311055 | 0.019 | 0.058 | 1          |
| ZNF469        | 0.025595045 | -1.1711559 | 0.009 | 0.042 | 1          |
| GPR161        | 0.027144805 | -0.6049876 | 0.023 | 0.064 | 1          |
| PON1          | 0.027594556 | -1.2928434 | 0     | 0.022 | 1          |
| NOVA1         | 0.027647795 | -0.7964148 | 0.347 | 0.414 | 1          |
| LGI2          | 0.035010374 | -2.7498361 | 0.009 | 0.039 | 1          |
| HDAC4         | 0.035321933 | -1.0489471 | 0.046 | 0.092 | 1          |
| ACTR3C        | 0.043041899 | -0.6534583 | 0.069 | 0.119 | 1          |
| USP45         | 0.048388466 | -0.6150227 | 0.023 | 0.058 | 1          |

**Supplementary Table 3.** Significant genes upregulated in GO pathways associated with resting cTfh cells.

| Pathway                                                 | pvalue  | padjust | Genes                                      | DEGs |
|---------------------------------------------------------|---------|---------|--------------------------------------------|------|
| response to hydrogen peroxide                           | 2.6E-06 | 1.9E-03 | TNFAIP3/JUN/HBB/HBA1/TXNIP/HBA2            | 6    |
| response to reactive oxygen species                     | 2.6E-06 | 1.9E-03 | TNFAIP3/JUN/HBB/HBA1/APOE/TXNIP/HBA2       | 7    |
| response to oxidative stress                            | 2.5E-05 | 1.2E-02 | TNFAIP3/JUN/HBB/HBA1/APOE/TXNIP/STOX1/HBA2 | 8    |
| hydrogen peroxide catabolic process                     | 3.6E-05 | 1.3E-02 | HBB/HBA1/HBA2                              | 3    |
| cellular oxidant detoxification                         | 9.3E-05 | 2.7E-02 | HBB/HBA1/APOE/HBA2                         | 4    |
| cellular detoxification                                 | 1.5E-04 | 3.3E-02 | HBB/HBA1/APOE/HBA2                         | 4    |
| bicarbonate transport                                   | 1.7E-04 | 3.3E-02 | HBB/HBA1/HBA2                              | 3    |
| cellular response to toxic substance                    | 1.8E-04 | 3.3E-02 | HBB/HBA1/APOE/HBA2                         | 4    |
| response to mechanical stimulus                         | 2.4E-04 | 3.4E-02 | JUN/HDAC4/TXNIP/CXCR4/CNTNAP2              | 5    |
| hydrogen peroxide metabolic process                     | 2.6E-04 | 3.4E-02 | HBB/HBA1/HBA2                              | 3    |
| detoxification                                          | 2.6E-04 | 3.4E-02 | HBB/HBA1/APOE/HBA2                         | 4    |
| endocytic vesicle lumen                                 | 1.7E-07 | 2.4E-05 | HBB/HBA1/APOE/HBA2                         | 4    |
| blood microparticle                                     | 9.0E-06 | 6.5E-04 | HBB/HBA1/APOE/IGKC/HBA2                    | 5    |
| cytosolic small ribosomal subunit                       | 6.6E-04 | 3.2E-02 | HBA1/HBA2                                  | 2    |
| oxygen binding                                          | 8.8E-06 | 1.8E-03 | HBB/HBA1/HBA2                              | 3    |
| antioxidant activity                                    | 3.5E-05 | 3.6E-03 | HBB/HBA1/APOE/HBA2                         | 4    |
| peroxidase activity                                     | 2.1E-04 | 1.4E-02 | HBB/HBA1/HBA2                              | 3    |
| oxidoreductase activity, acting on peroxide as acceptor | 2.8E-04 | 1.4E-02 | HBB/HBA1/HBA2                              | 3    |

**Supplementary Table 4.** Significant genes upregulated in GO pathways associated with expanded cTfh cells.

| Pathway                                                                                                                   | pvalue  | padjust | Genes                                                                         | DEGs |
|---------------------------------------------------------------------------------------------------------------------------|---------|---------|-------------------------------------------------------------------------------|------|
| Fc receptor signaling pathway                                                                                             | 3.3E-10 | 4.2E-07 | IGLC2/IGLV2-8/IGHG3/ELMO2/IGLV2-14/IGLC3/PSMD13/PTPRC/GRAP2/PSMA4/ACTG1       | 11   |
| phagocytosis                                                                                                              | 7.2E-10 | 4.5E-07 | IGLC2/IGLV2-8/IGHG3/ELMO2/IGLV2-14/IGLC3/CDC42SE1/RAC2/PTPRC/ACTG1/ITGAL/RHOG | 12   |
| immune response-regulating cell surface receptor signaling pathway involved in phagocytosis                               | 4.3E-09 | 1.3E-06 | IGLC2/IGLV2-8/IGHG3/ELMO2/IGLV2-14/IGLC3/PTPRC/ACTG1                          | 8    |
| Fc-gamma receptor signaling pathway involved in phagocytosis                                                              | 4.3E-09 | 1.3E-06 | IGLC2/IGLV2-8/IGHG3/ELMO2/IGLV2-14/IGLC3/PTPRC/ACTG1                          | 8    |
| Fc-gamma receptor signaling pathway                                                                                       | 5.5E-09 | 1.4E-06 | IGLC2/IGLV2-8/IGHG3/ELMO2/IGLV2-14/IGLC3/PTPRC/ACTG1                          | 8    |
| Fc receptor mediated stimulatory signaling pathway                                                                        | 7.1E-09 | 1.5E-06 | IGLC2/IGLV2-8/IGHG3/ELMO2/IGLV2-14/IGLC3/PTPRC/ACTG1                          | 8    |
| activation of immune response                                                                                             | 1.3E-07 | 2.3E-05 | IGLC2/IGLV2-8/IGHG3/ELMO2/IGLV2-14/IGLC3/PSMD13/PTPRC/GRAP2/PSMA4/ACTG1/CFD   | 12   |
| immune response-activating cell surface receptor signaling pathway                                                        | 2.3E-07 | 3.2E-05 | IGLC2/IGLV2-8/IGHG3/ELMO2/IGLV2-14/IGLC3/PSMD13/PTPRC/GRAP2/PSMA4/ACTG1       | 11   |
| immune response-activating signal transduction                                                                            | 2.3E-07 | 3.2E-05 | IGLC2/IGLV2-8/IGHG3/ELMO2/IGLV2-14/IGLC3/PSMD13/PTPRC/GRAP2/PSMA4/ACTG1       | 11   |
| humoral immune response mediated by circulating immunoglobulin                                                            | 2.8E-07 | 3.2E-05 | IGLC2/IGLV2-8/IGHG3/IGLV2-14/IGLC3/PTPRC                                      | 6    |
| regulation of humoral immune response                                                                                     | 2.8E-07 | 3.2E-05 | IGLC2/IGLV2-8/IGHG3/IGLV2-14/IGLC3/PTPRC                                      | 6    |
| complement activation                                                                                                     | 4.7E-07 | 4.9E-05 | IGLC2/IGLV2-8/IGHG3/IGLV2-14/IGLC3/CFD                                        | 6    |
| immune response-regulating cell surface receptor signaling pathway                                                        | 5.6E-07 | 5.2E-05 | IGLC2/IGLV2-8/IGHG3/ELMO2/IGLV2-14/IGLC3/PSMD13/PTPRC/GRAP2/PSMA4/ACTG1       | 11   |
| immune response-regulating signaling pathway                                                                              | 6.0E-07 | 5.2E-05 | IGLC2/IGLV2-8/IGHG3/ELMO2/IGLV2-14/IGLC3/PSMD13/PTPRC/GRAP2/PSMA4/ACTG1       | 11   |
| humoral immune response                                                                                                   | 6.3E-07 | 5.2E-05 | IGLC2/IGLV2-8/IGHG3/IGLV2-14/IGLC3/GPI/PTPRC/CFD                              | 8    |
| Fc-epsilon receptor signaling pathway                                                                                     | 7.4E-07 | 5.8E-05 | IGLC2/IGLV2-8/IGLV2-14/IGLC3/PSMD13/GRAP2/PSMA4                               | 7    |
| complement activation, classical pathway                                                                                  | 2.4E-06 | 1.7E-04 | IGLC2/IGLV2-8/IGHG3/IGLV2-14/IGLC3                                            | 5    |
| regulation of complement activation                                                                                       | 2.4E-06 | 1.7E-04 | IGLC2/IGLV2-8/IGHG3/IGLV2-14/IGLC3                                            | 5    |
| phagocytosis, engulfment                                                                                                  | 1.0E-05 | 6.9E-04 | IGLC2/IGHG3/IGLC3/RAC2/RHOG                                                   | 5    |
| regulation of immune effector process                                                                                     | 1.5E-05 | 9.2E-04 | IGLC2/IGLV2-8/IGHG3/IGLV2-14/IGLC3/GPI/RAC2/PTPRC/AP1G1                       | 9    |
| immunoglobulin mediated immune response                                                                                   | 1.6E-05 | 9.3E-04 | IGLC2/IGLV2-8/IGHG3/IGLV2-14/IGLC3/PTPRC                                      | 6    |
| B cell mediated immunity                                                                                                  | 1.7E-05 | 9.7E-04 | IGLC2/IGLV2-8/IGHG3/IGLV2-14/IGLC3/PTPRC                                      | 6    |
| plasma membrane invagination                                                                                              | 1.9E-05 | 1.0E-03 | IGLC2/IGHG3/IGLC3/RAC2/RHOG                                                   | 5    |
| membrane invagination                                                                                                     | 3.0E-05 | 1.6E-03 | IGLC2/IGHG3/IGLC3/RAC2/RHOG                                                   | 5    |
| lymphocyte mediated immunity                                                                                              | 7.5E-05 | 3.7E-03 | IGLC2/IGLV2-8/IGHG3/IGLV2-14/IGLC3/PTPRC/AP1G1                                | 7    |
| antigen receptor-mediated signaling pathway                                                                               | 7.7E-05 | 3.7E-03 | IGLC2/IGHG3/IGLC3/PSMD13/PTPRC/GRAP2/PSMA4                                    | 7    |
| leukocyte migration                                                                                                       | 1.4E-04 | 6.4E-03 | IGLC2/IGLV2-8/IGLV2-14/IGLC3/RAC2/SLC7A6/ITGAL/RHOG                           | 8    |
| regulation of B cell activation                                                                                           | 1.8E-04 | 7.9E-03 | IGLC2/IGHG3/IGLC3/HMGB3/PTPRC                                                 | 5    |
| B cell receptor signaling pathway                                                                                         | 2.4E-04 | 1.0E-02 | IGLC2/IGHG3/IGLC3/PTPRC                                                       | 4    |
| regulation of lymphocyte activation                                                                                       | 2.5E-04 | 1.0E-02 | IGLC2/IGHG3/IGLC3/HMGB3/RAC2/PTPRC/GRAP2/AP1G1                                | 8    |
| phagocytosis, recognition                                                                                                 | 2.9E-04 | 1.2E-02 | IGLC2/IGHG3/IGLC3                                                             | 3    |
| positive regulation of B cell activation                                                                                  | 4.5E-04 | 1.8E-02 | IGLC2/IGHG3/IGLC3/PTPRC                                                       | 4    |
| adaptive immune response based on somatic recombination of immune receptors built from immunoglobulin superfamily domains | 6.7E-04 | 2.5E-02 | IGLC2/IGLV2-8/IGHG3/IGLV2-14/IGLC3/PTPRC                                      | 6    |
| regulation of leukocyte activation                                                                                        | 7.2E-04 | 2.6E-02 | IGLC2/IGHG3/IGLC3/HMGB3/RAC2/PTPRC/GRAP2/AP1G1                                | 8    |
| leukocyte degranulation                                                                                                   | 7.6E-04 | 2.7E-02 | GPI/RAC2/PSMD13/PTPRC/AP1G1/CFD/ITGAL/RHOG                                    | 8    |
| antigen processing and presentation of peptide antigen                                                                    | 8.6E-04 | 3.0E-02 | ERAP2/PSMD13/PSMA4/DCTN5/AP1G1                                                | 5    |
| positive regulation of lymphocyte activation                                                                              | 9.0E-04 | 3.1E-02 | IGLC2/IGHG3/IGLC3/PTPRC/GRAP2/AP1G1                                           | 6    |
| negative regulation of peptidyl-tyrosine phosphorylation                                                                  | 9.2E-04 | 3.1E-02 | SOCS4/PTPRC/PARP14                                                            | 3    |
| immunoglobulin production                                                                                                 | 1.3E-03 | 4.3E-02 | IGLV2-8/IGLV2-14/GPI/PTPRC                                                    | 4    |
| immunoglobulin complex                                                                                                    | 1.9E-07 | 3.7E-05 | IGLC2/IGLV2-8/IGHG3/IGLV2-14/IGLC3                                            | 5    |
| immunoglobulin complex, circulating                                                                                       | 8.6E-05 | 8.2E-03 | IGLC2/IGHG3/IGLC3                                                             | 3    |
| blood microparticle                                                                                                       | 4.9E-04 | 3.1E-02 | IGLC2/IGHG3/IGLC3/ACTG1                                                       | 4    |
| antigen binding                                                                                                           | 1.9E-05 | 3.6E-03 | IGLC2/IGLV2-8/IGHG3/IGLV2-14/IGLC3                                            | 5    |
| immunoglobulin receptor binding                                                                                           | 1.3E-04 | 1.2E-02 | IGLC2/IGHG3/IGLC3                                                             | 3    |

**Supplementary Table 5.** The number of unique and total CDR3s identified for each subject by condition.

| Subject | Year    | Day | State     | No. unique CDR3s | Total CDR3s |
|---------|---------|-----|-----------|------------------|-------------|
| 2       | 2016-17 | d0  | activated | 360              | 481         |
|         |         |     | resting   | 6016             | 8186        |
|         |         | d7  | activated | 40               | 50          |
|         |         |     | resting   | 66               | 71          |
|         | 2017-18 | d0  | activated | 28               | 34          |
|         |         |     | resting   | 299              | 381         |
|         |         | d7  | activated | 174              | 223         |
|         |         |     | resting   | 3001             | 4148        |
| 3       | 2016-17 | d0  | activated | 93               | 112         |
|         |         |     | resting   | 2005             | 2815        |
|         |         | d7  | activated | 287              | 387         |
|         |         |     | resting   | 1909             | 2511        |
|         | 2017-18 | d0  | activated | 132              | 161         |
|         |         |     | resting   | 2219             | 2942        |
|         |         | d7  | activated | 29               | 37          |
|         |         |     | resting   | 350              | 476         |
| 4       | 2016-17 | d0  | activated | 134              | 159         |
|         |         |     | resting   | 5587             | 7835        |
|         |         | d7  | activated | 532              | 784         |
|         |         |     | resting   | 6987             | 9963        |
|         | 2017-18 | d0  | activated | 573              | 731         |
|         |         |     | resting   | 10728            | 16717       |
|         |         | d7  | activated | 186              | 202         |
|         |         |     | resting   | 5607             | 7984        |
| 5       | 2016-17 | d0  | activated | 1133             | 1332        |
|         |         |     | resting   | 22715            | 30442       |
|         |         | d7  | activated | 4675             | 9327        |
|         |         |     | resting   | 21034            | 27635       |
|         | 2017-18 | d0  | activated | 2089             | 2539        |
|         |         |     | resting   | 26777            | 37528       |
|         |         | d7  | activated | 1385             | 1619        |
|         |         |     | resting   | 17742            | 23698       |
| 6       | 2016-17 | d0  | activated | 628              | 719         |
|         |         |     | resting   | 25431            | 36637       |
|         |         | d7  | activated | 1810             | 4056        |
|         |         |     | resting   | 14879            | 20002       |
|         | 2017-18 | d0  | activated | 291              | 327         |
|         |         |     | resting   | 17152            | 24280       |
|         |         | d7  | activated | 492              | 543         |
|         |         |     | resting   | 11023            | 14645       |
| 7       | 2016-17 | d0  | activated | 195              | 225         |
|         |         |     | resting   | 4222             | 5710        |
|         |         | d7  | activated | 1806             | 2710        |
|         |         |     | resting   | 4960             | 6859        |
|         | 2017-18 | d0  | activated | 0                | 0           |
|         |         |     | resting   | 19258            | 27391       |
|         |         | d7  | activated | 1186             | 1681        |
|         |         |     | resting   | 2535             | 3614        |

| Subject | Year    | Day       | State     | No. unique CDR3s | Total CDR3s |
|---------|---------|-----------|-----------|------------------|-------------|
| 8       | 2016-17 | d0        | activated | 101              | 119         |
|         |         |           | resting   | 1170             | 1447        |
|         |         | d7        | activated | 137              | 158         |
|         |         |           | resting   | 2732             | 3311        |
|         | 2017-18 | d0        | activated | 129              | 139         |
|         |         |           | resting   | 4591             | 5742        |
| d7      |         | activated | 555       | 812              |             |
|         |         | resting   | 3133      | 4147             |             |
| 9       | 2016-17 | d0        | activated | 498              | 668         |
|         |         |           | resting   | 25941            | 38598       |
|         |         | d7        | activated | 3355             | 5479        |
|         |         |           | resting   | 36368            | 53693       |
|         | 2017-18 | d0        | activated | 890              | 1204        |
|         |         |           | resting   | 38586            | 57739       |
| d7      |         | activated | 858       | 1227             |             |
|         |         | resting   | 36564     | 54700            |             |
| 10      | 2016-17 | d0        | activated | 3014             | 6088        |
|         |         |           | resting   | 17870            | 23546       |
|         |         | d7        | activated | 667              | 888         |
|         |         |           | resting   | 3207             | 3849        |
|         | 2017-18 | d0        | activated | 273              | 319         |
|         |         |           | resting   | 6637             | 8253        |
| d7      |         | activated | 1512      | 2325             |             |
|         |         | resting   | 9436      | 11724            |             |
| 11      | 2016-17 | d0        | activated | 575              | 655         |
|         |         |           | resting   | 9855             | 12698       |
|         |         | d7        | activated | 872              | 1079        |
|         |         |           | resting   | 6229             | 8039        |
|         | 2017-18 | d0        | activated | 1067             | 1332        |
|         |         |           | resting   | 8472             | 11121       |
| d7      |         | activated | 1520      | 1937             |             |
|         |         | resting   | 3950      | 4508             |             |
| 12      | 2016-17 | d0        | activated | 1328             | 1897        |
|         |         |           | resting   | 16699            | 24959       |
|         |         | d7        | activated | 177              | 220         |
|         |         |           | resting   | 29178            | 41424       |
|         | 2017-18 | d0        | activated | 2237             | 3629        |
|         |         |           | resting   | 7267             | 9970        |
| d7      |         | activated | 3632      | 5792             |             |
|         |         | resting   | 20562     | 27912            |             |
| 14      | 2016-17 | d0        | activated | 32               | 36          |
|         |         |           | resting   | 3122             | 4286        |
|         |         | d7        | activated | 578              | 737         |
|         |         |           | resting   | 1187             | 1486        |
|         | 2017-18 | d0        | activated | 800              | 956         |
|         |         |           | resting   | 8265             | 12977       |
| d7      |         | activated | 589       | 780              |             |
|         |         | resting   | 4782      | 6289             |             |

**Supplementary Table 6.** Median read count (interquartile range) and average per well by subject included for RNAseq analysis for resting and activated cTfh cells.

| <b>Subject</b> | <b>Year</b> | <b>State</b> | <b>Median (IQR)</b> | <b>Average</b> |
|----------------|-------------|--------------|---------------------|----------------|
| 6              | 2016-17     | resting      | 4221 (2387-6863)    | 5219           |
|                |             | activated    | 3210 (1960-7066)    | 4796           |
| 8              | 2017-18     | resting      | 3272 (1611-5700)    | 4259           |
|                |             | activated    | 2756 (1793-3708)    | 3005           |
| 10             | 2017-18     | resting      | 2092 (1204-3558)    | 2691           |
|                |             | activated    | 2498 (1322-3433)    | 2574           |
| 11             | 2016-17     | resting      | 1881 (1164-2889)    | 2689           |
|                |             | activated    | 2640 (1345-4191)    | 3418           |
